# Supplementary material for: An amorphous array of poly(N-isopropylacrylamide) brush-coated silica particles for thermally tunable angle-independent photonic band gap materials
Source: Royal Society of Chemistry journal article supplement (doi:10.1039/c2nj40368d), 2012-01-01
Supplement: c2nj40368d.pdf [file c2nj40368d.pdf]

# Supporting Information for

## Amorphous Array of Poly(*N*-isopropylacrylamide) Brush-Coated Silica Particles for Thermally Tunable Angle-Independent Photonic Band Gap Materials

Yoshie Gotoh,<sup>a</sup> Hiromasa Suzuki,<sup>a</sup> Naomi Kumano,<sup>a</sup> Takahiro Seki,<sup>a</sup> Kiyofumi Katagiri,<sup>b</sup> and Yukikazu Takeoka<sup>a\*</sup>

<sup>a</sup>*Department of Molecular Design & Engineering, Nagoya University, Furo-cho, Chikusa-ku, Nagoya, 464-8603, Japan*

*E-mail: [ytakeoka@apchem.nagoya-u.ac.jp](mailto:ytakeoka@apchem.nagoya-u.ac.jp)*

<sup>b</sup>*Department of Applied Chemistry, Graduate School of Engineering, Nagoya University, Furo-cho, Chikusa-ku, Nagoya 464-8603, Japan*

\*To whom correspondence should be addressed. E-mail: [ytakeoka@apchem.nagoya-u.ac.jp](mailto:ytakeoka@apchem.nagoya-u.ac.jp)

## Table 1S

| Sample No. | [M] : [I] : [Cu <sub>1</sub> ] : [L]<br>(M / DMSO) (w/w) | Temperature<br>(°C) | Reaction time<br>(h) | Conversion<br>(%) | $M_{n\text{-theol.}} / 10000$ | $M_{n\text{-GPC}} / 10000$ | $M_w / M_n$ |
|------------|----------------------------------------------------------|---------------------|----------------------|-------------------|-------------------------------|----------------------------|-------------|
| 1'         |                                                          |                     |                      | 81                | 4.58                          | 3.77                       | 1.26        |
| 2'         |                                                          |                     |                      | 63                | 3.56                          | 3.34                       | 1.20        |
| 3'         |                                                          |                     |                      | 80                | 4.52                          | 3.80                       | 1.24        |
| 4'         |                                                          |                     |                      | 70                | 3.96                          | 3.58                       | 1.21        |
| 5'         |                                                          |                     |                      | 85                | 4.80                          | 3.52                       | 1.27        |
| 6'         |                                                          |                     |                      | 71                | 4.00                          | 3.49                       | 1.26        |
| 7'         | 500 : 1 : 1 : 1                                          | 20                  | 5                    | 80                | 4.52                          | 2.85                       | 1.20        |
| 8'         | (1/2)                                                    |                     |                      | 77                | 4.35                          | 3.62                       | 1.20        |
| 9'         |                                                          |                     |                      | 70                | 3.96                          | 4.42                       | 1.24        |
| 10'        |                                                          |                     |                      | 65                | 3.69                          | 4.26                       | 1.32        |
| 11'        |                                                          |                     |                      | 84                | 4.75                          | 4.26                       | 1.32        |
| 12'        |                                                          |                     |                      | 72                | 4.07                          | 3.74                       | 1.24        |
| 13'        |                                                          |                     |                      | 92                | 5.20                          | 4.09                       | 1.27        |
| 14'        |                                                          |                     |                      | 70                | 3.96                          | 2.56                       | 1.29        |
| Ave.       |                                                          |                     |                      | 76                |                               | 3.66                       | 1.25        |

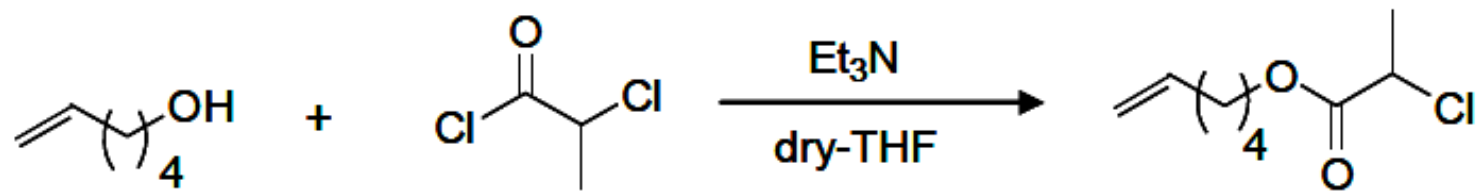

5-hexen-1-yl 2-chloro-2-methylpropionate

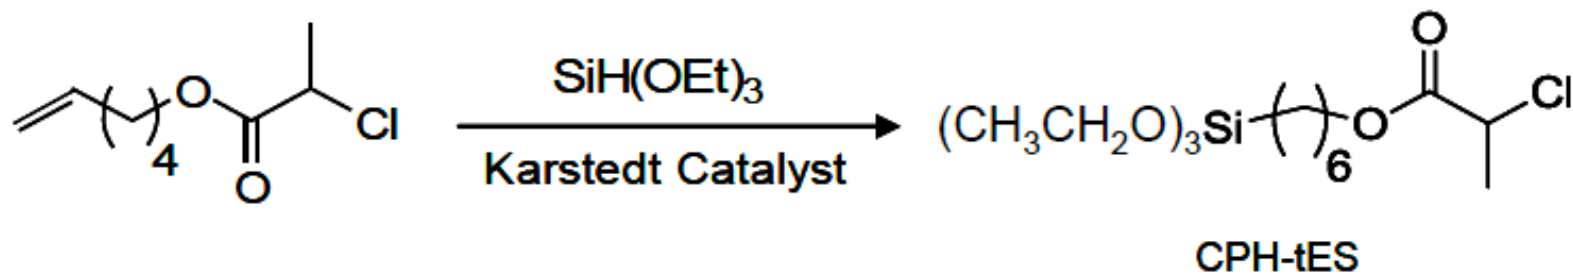

Figure S1. Synthetic route of 6-(2-chloro)propionyloxyhexyltriethoxysilane (CPH-tES).

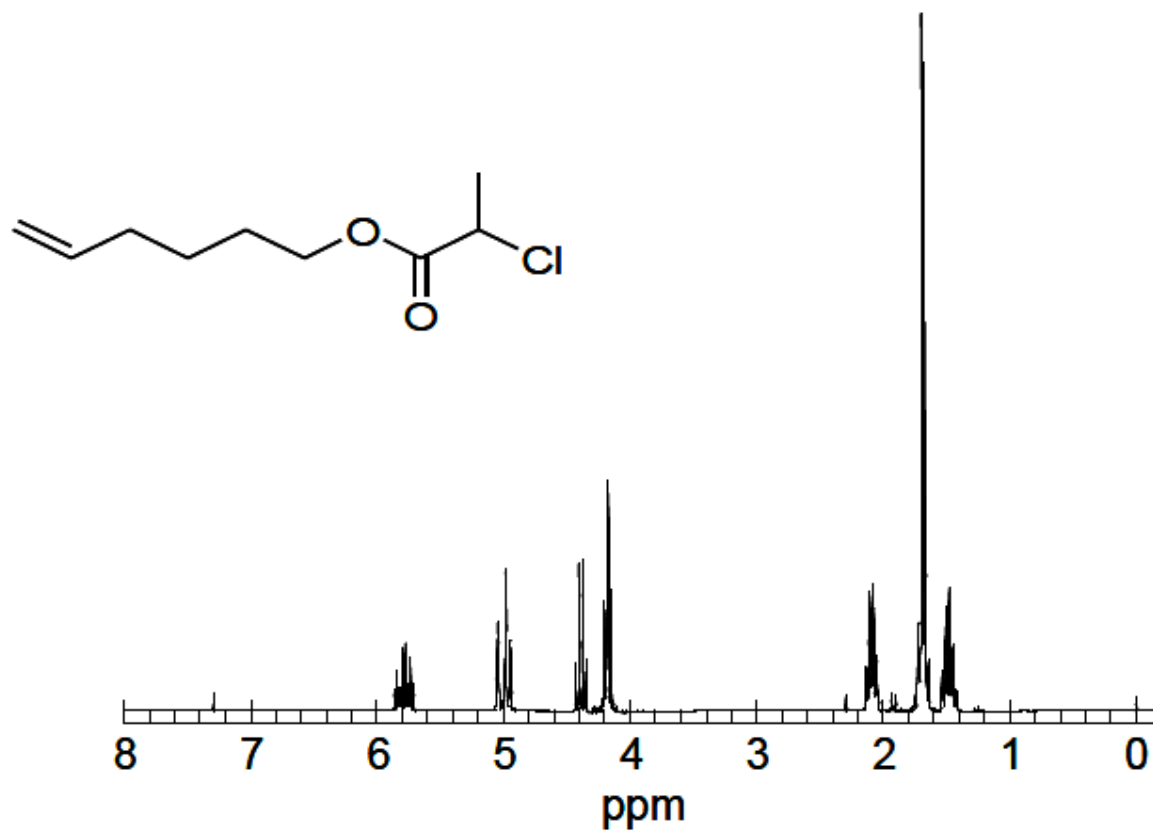

Figure S2. <sup>1</sup>H NMR spectrum of 5-hexen-1-yl 2-chloro-2-methylpropionate in CDCl<sub>3</sub>.

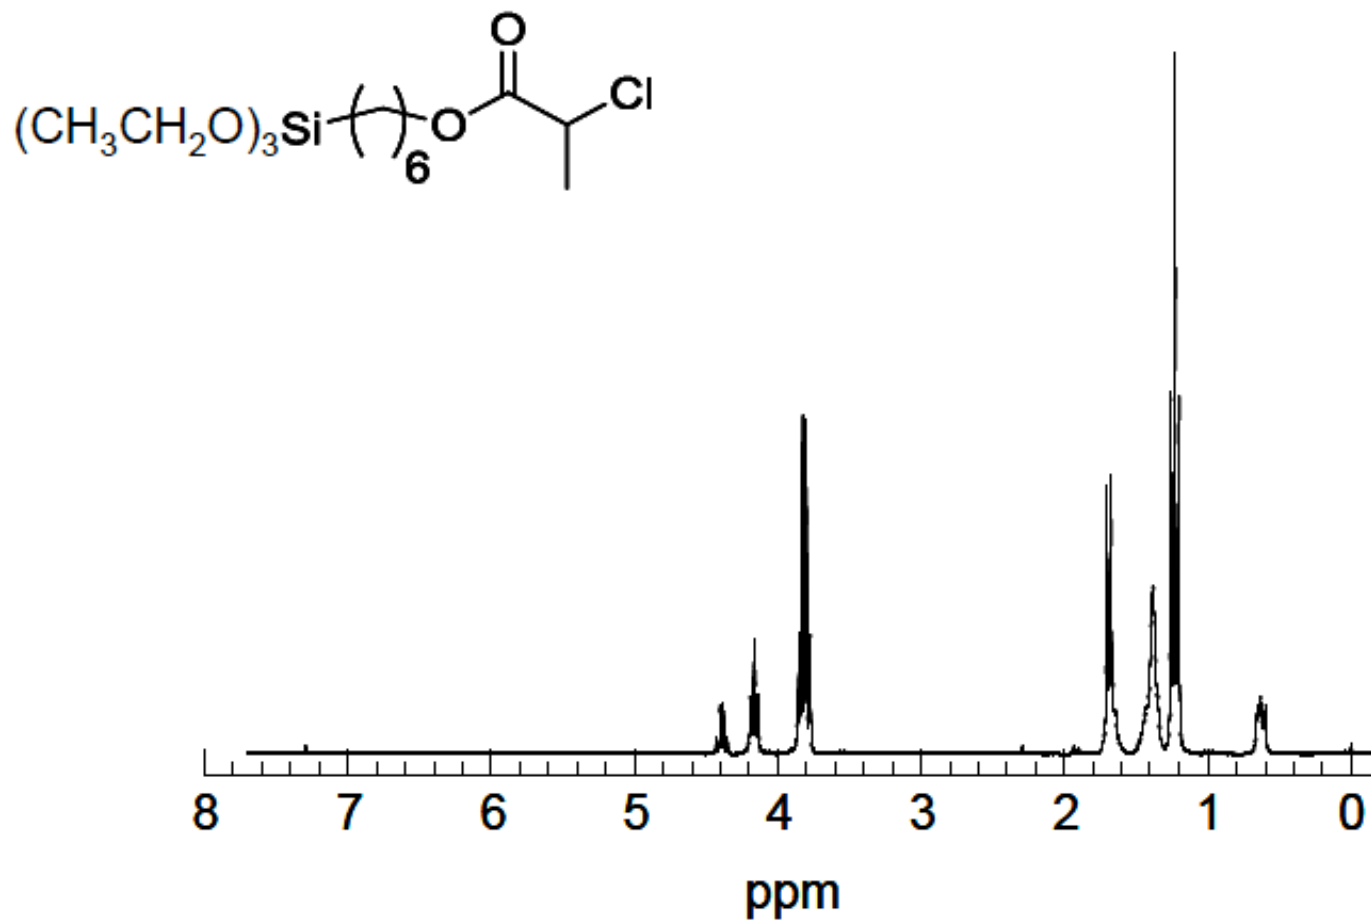

Figure S3. <sup>1</sup>H NMR spectrum of CPH-tES in  $\text{CDCl}_3$ .

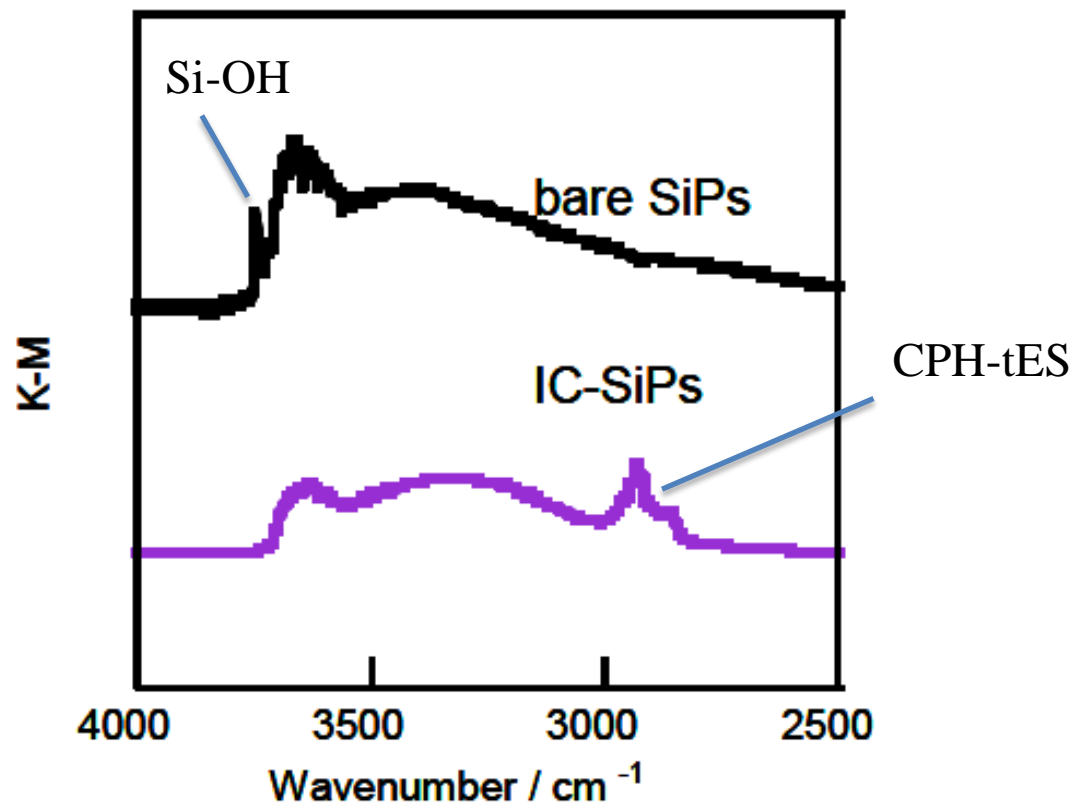

Figure S4. Diffuse reflectance FT-IR spectra of bare SiO<sub>2</sub> particle (bare SiPs) and Initiator Coated SiO<sub>2</sub> particle (IC-SiPs).

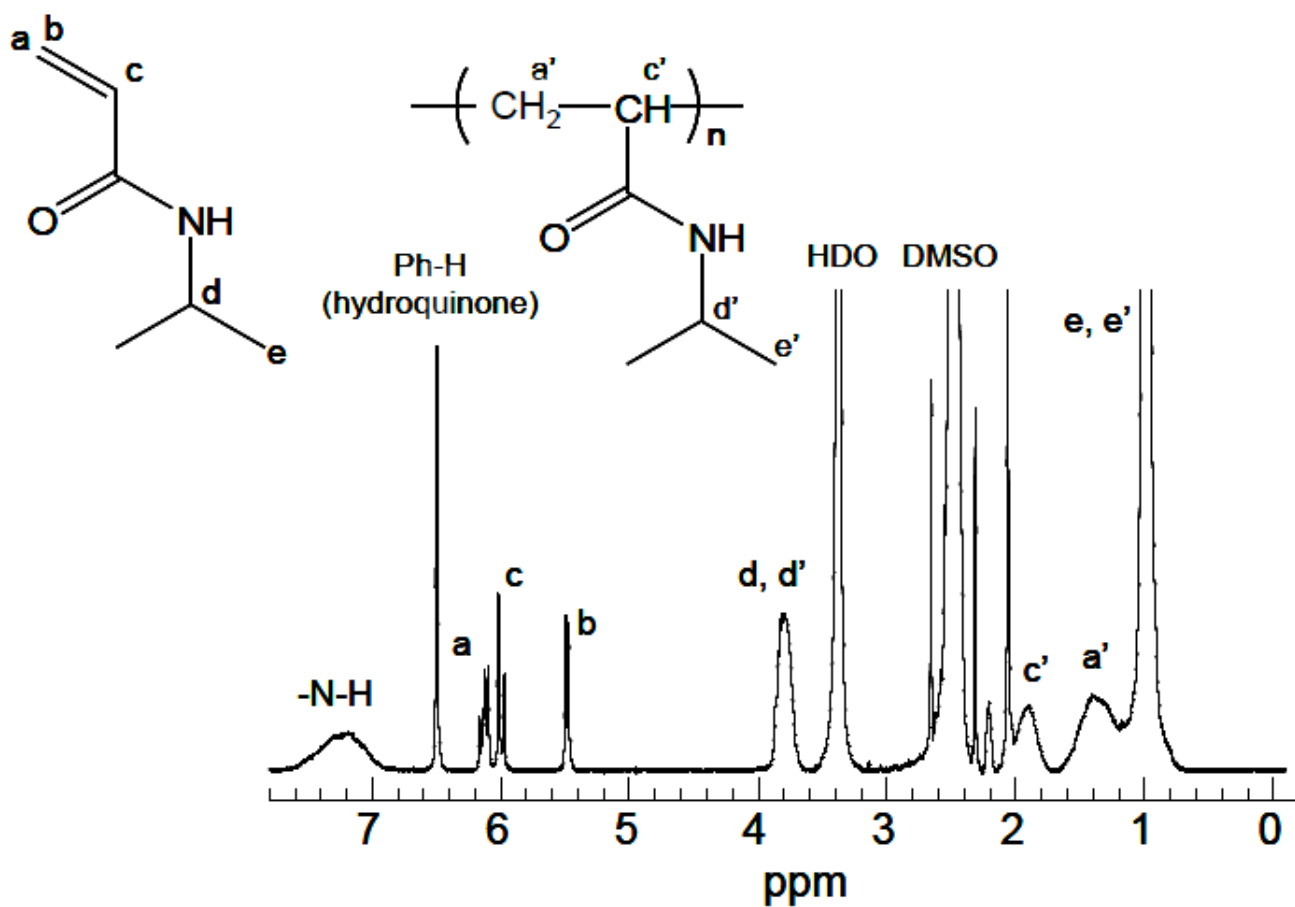

Figure S5.  $^1\text{H-NMR}$  spectra of ATRP reaction solution for NIPA before purification in  $d$ -DMSO. This data was used to determine the monomer conversion.

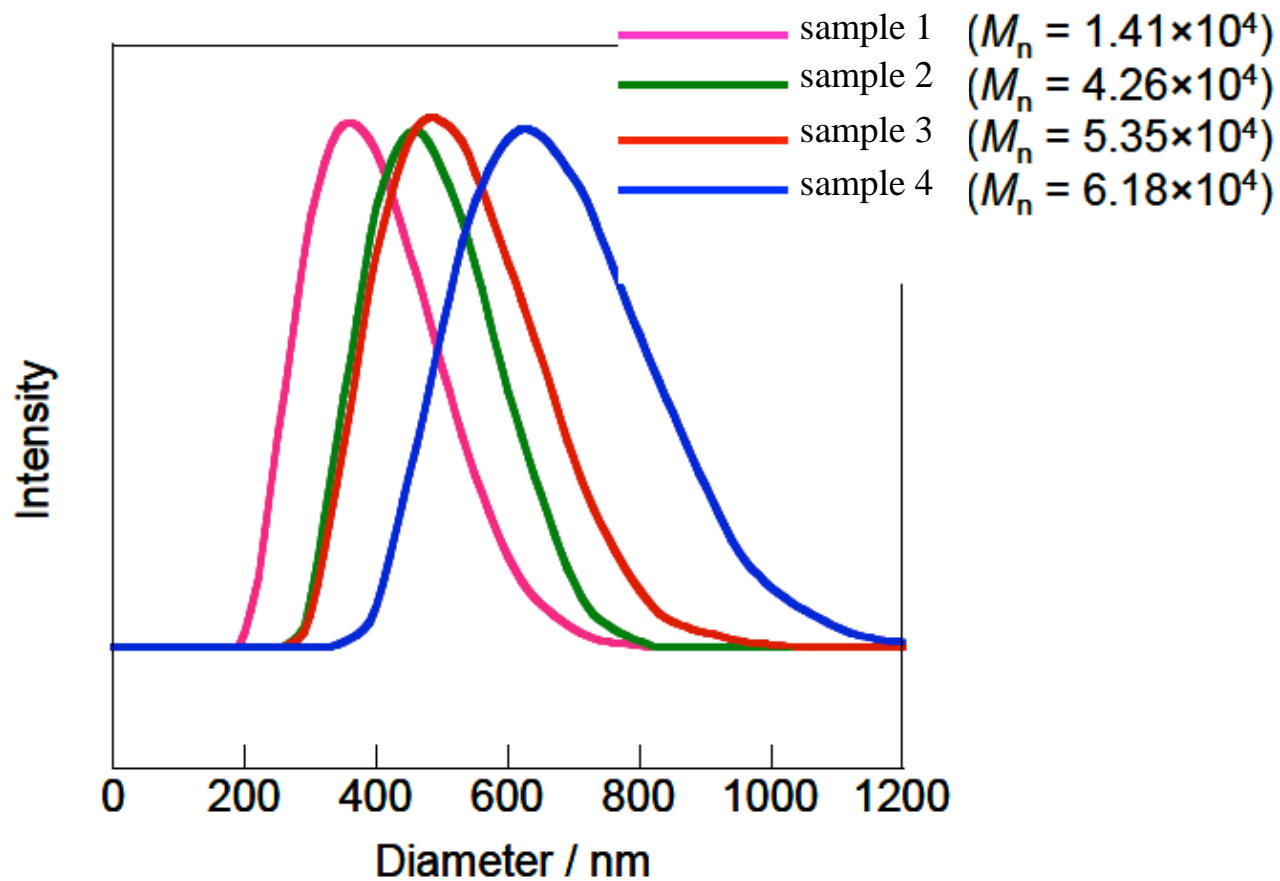

Figure S6. GPC traces for free PNIPA of sample 1-4.



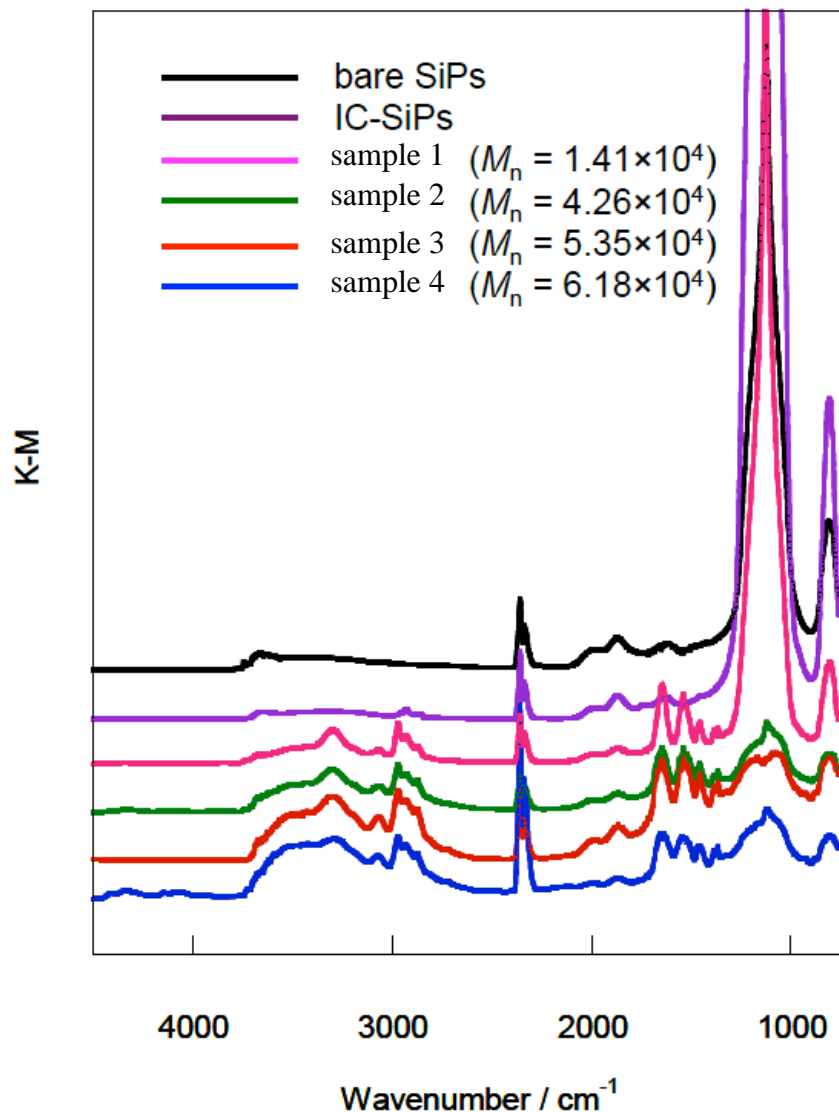

Figure S7. FT-IR spectra of bare SiO<sub>2</sub> particle and PNIPA-SiPs with different polymer chain length. The presence of PNIPA in the resulting particles was confirmed by these diffuse reflectance FT-IR spectra.

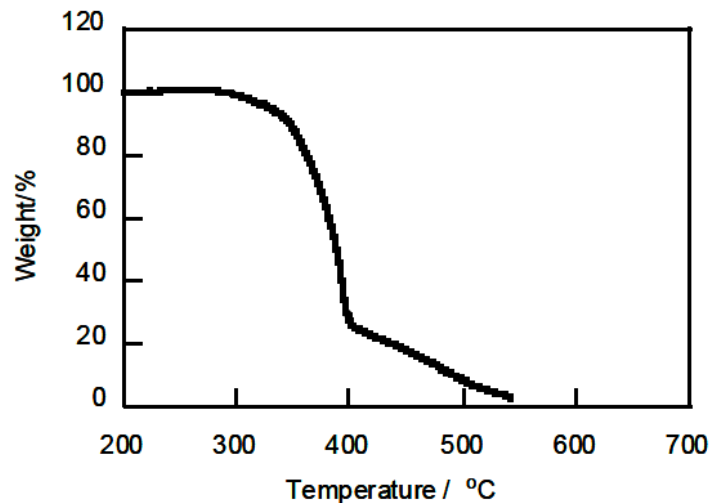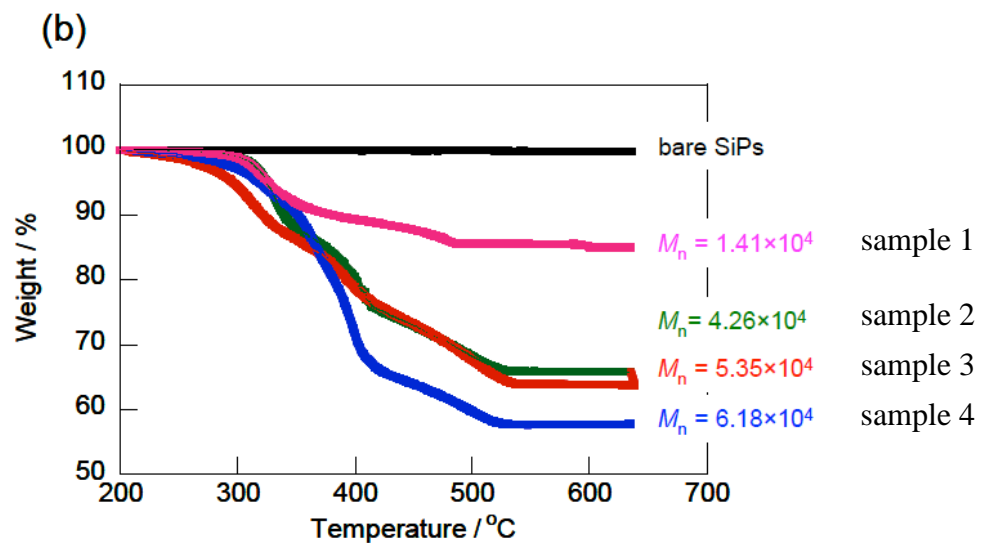

Figure S8. Thermogravimetric Analysis in air: TG of (a) free PNIPA, (b) bare SiO<sub>2</sub> particle and PNIPA-SiPs of sample 1-4.

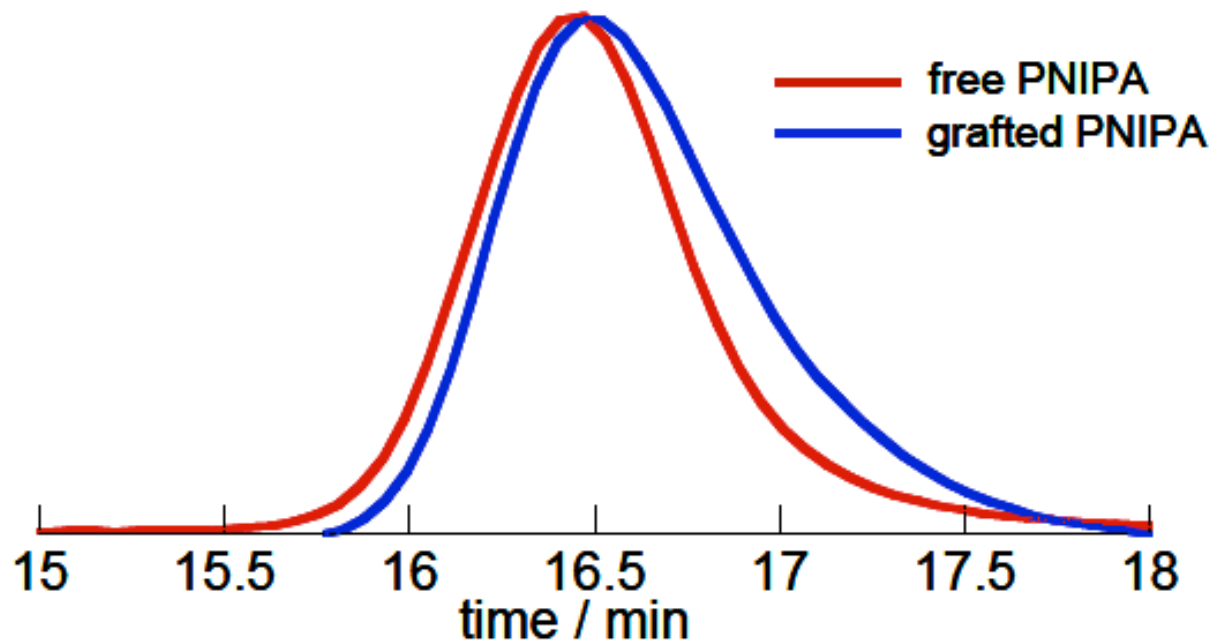

---

|               | $M_n / 10^4$ | $M_w / M_n$ |
|---------------|--------------|-------------|
| free PNIPA    | 4.61         | 1.21        |
| grafted PNIPA | 4.10         | 1.31        |

---

Figure S9. GPC chart of free PNIPA and grafted PNIPA.

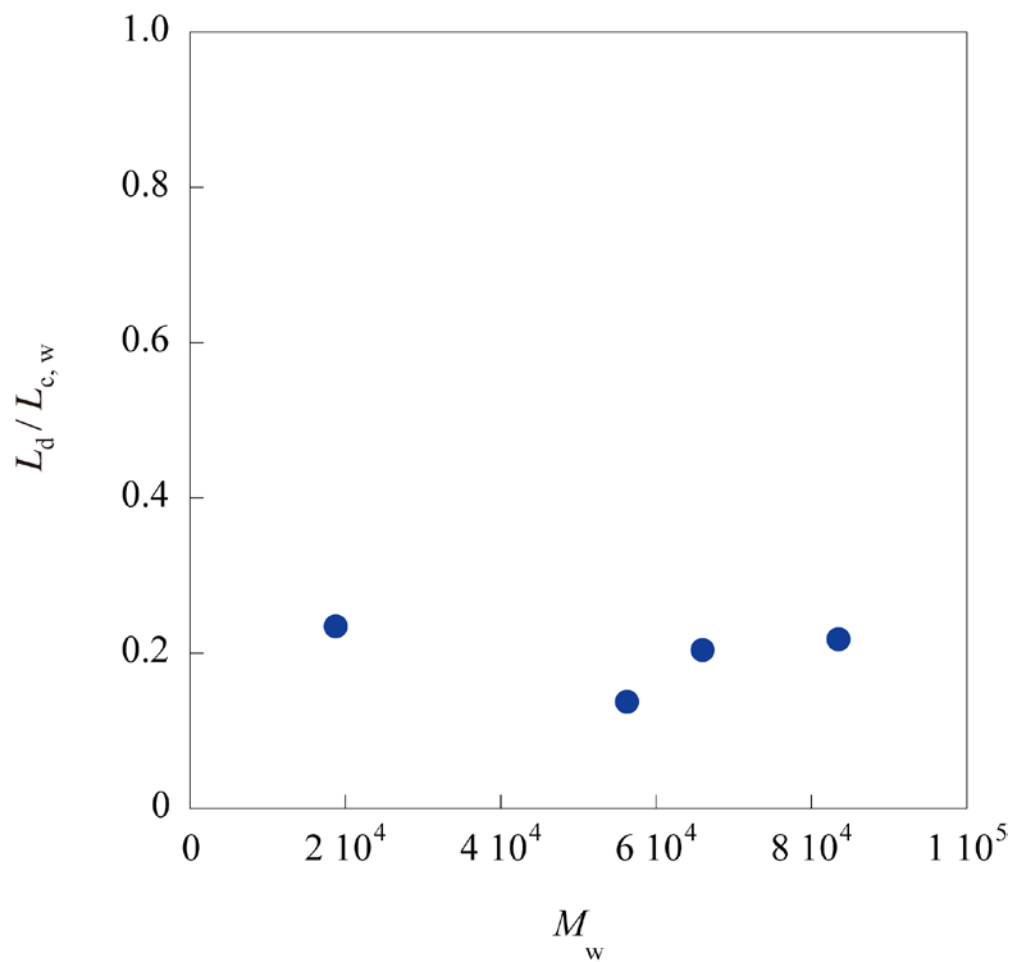

Figure S10. Plots of  $L_d/L_{c,w}$  versus weight average molecular weight,  $M_w$ .

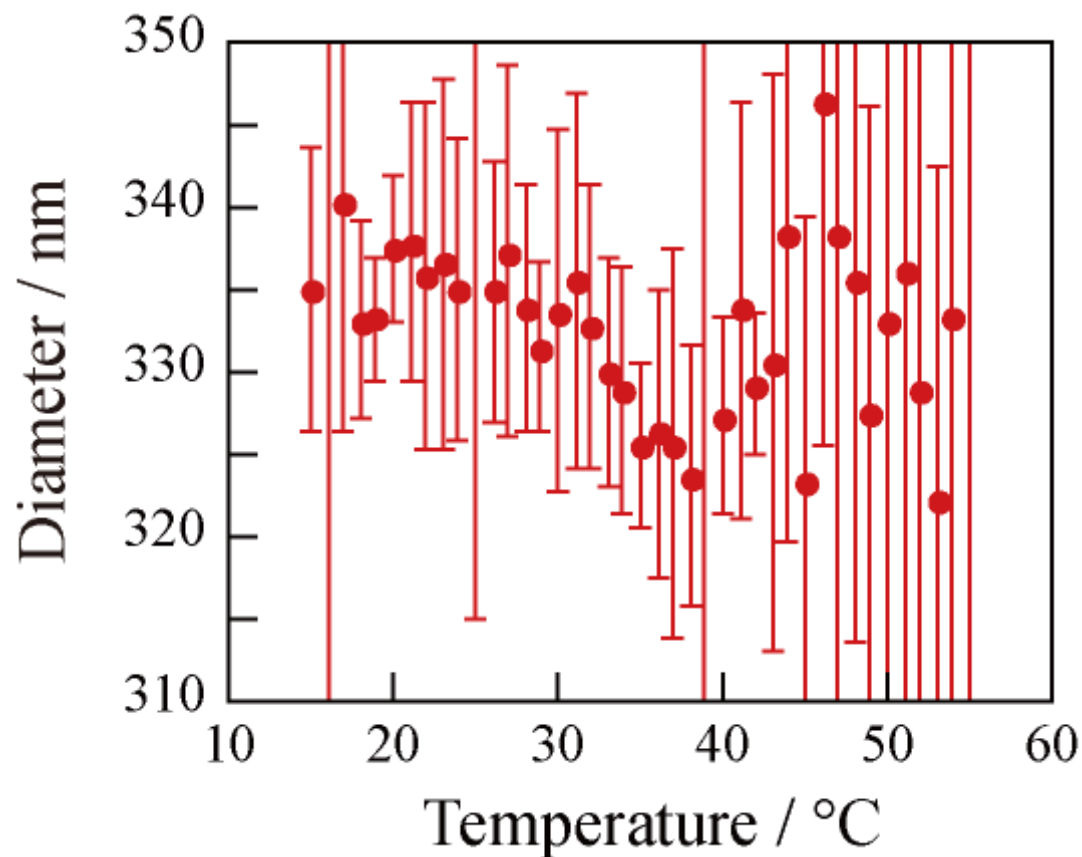

Figure S11. Temperature dependence of the hydrodynamic diameter for PNIPA-SiPs with PNIPA of  $M_n = 1.41 \times 10^4$ .

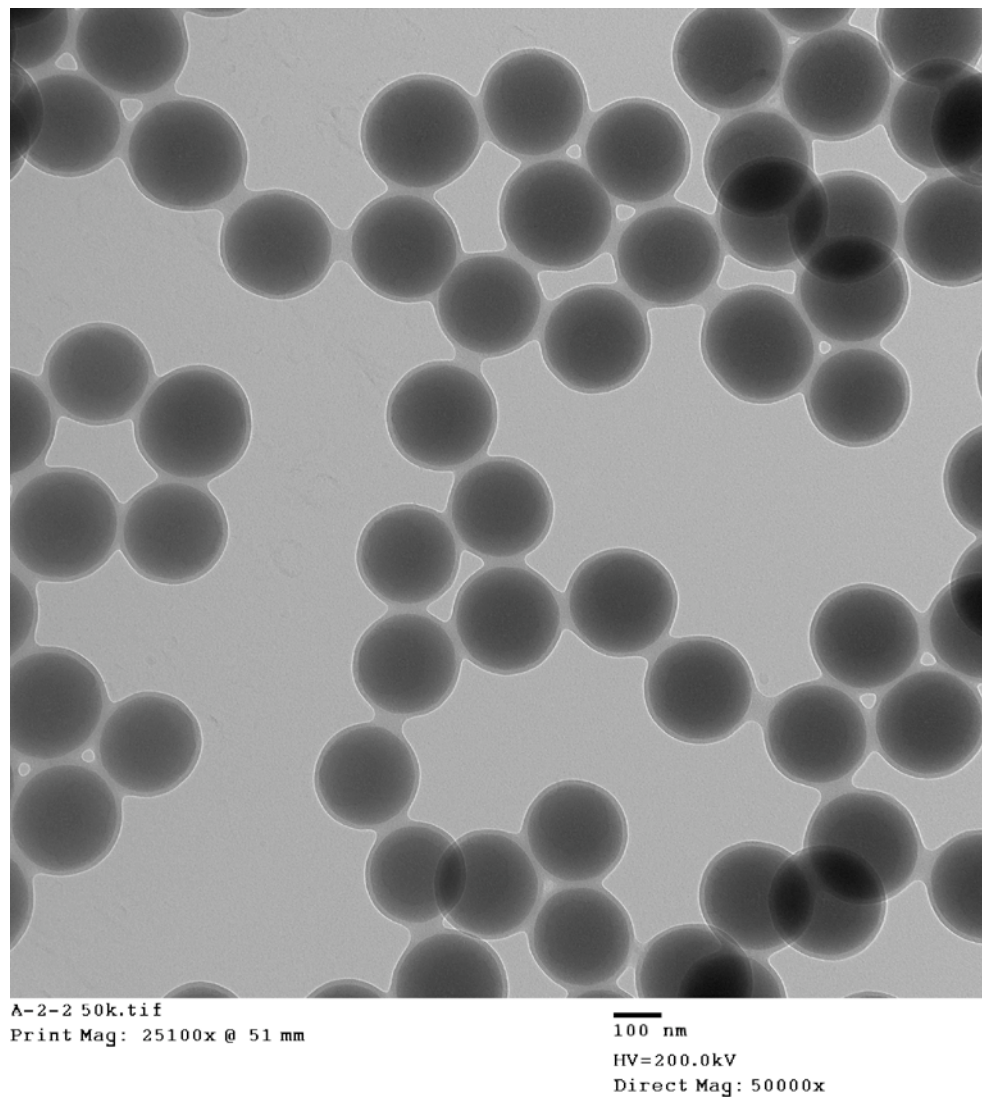

Figure S12. TEM image of PNIPA-SiP using 207 nm silica particles modified with PNIPA of  $M_n = 25,500$ , and  $M_w/M_n = 1.29$ .

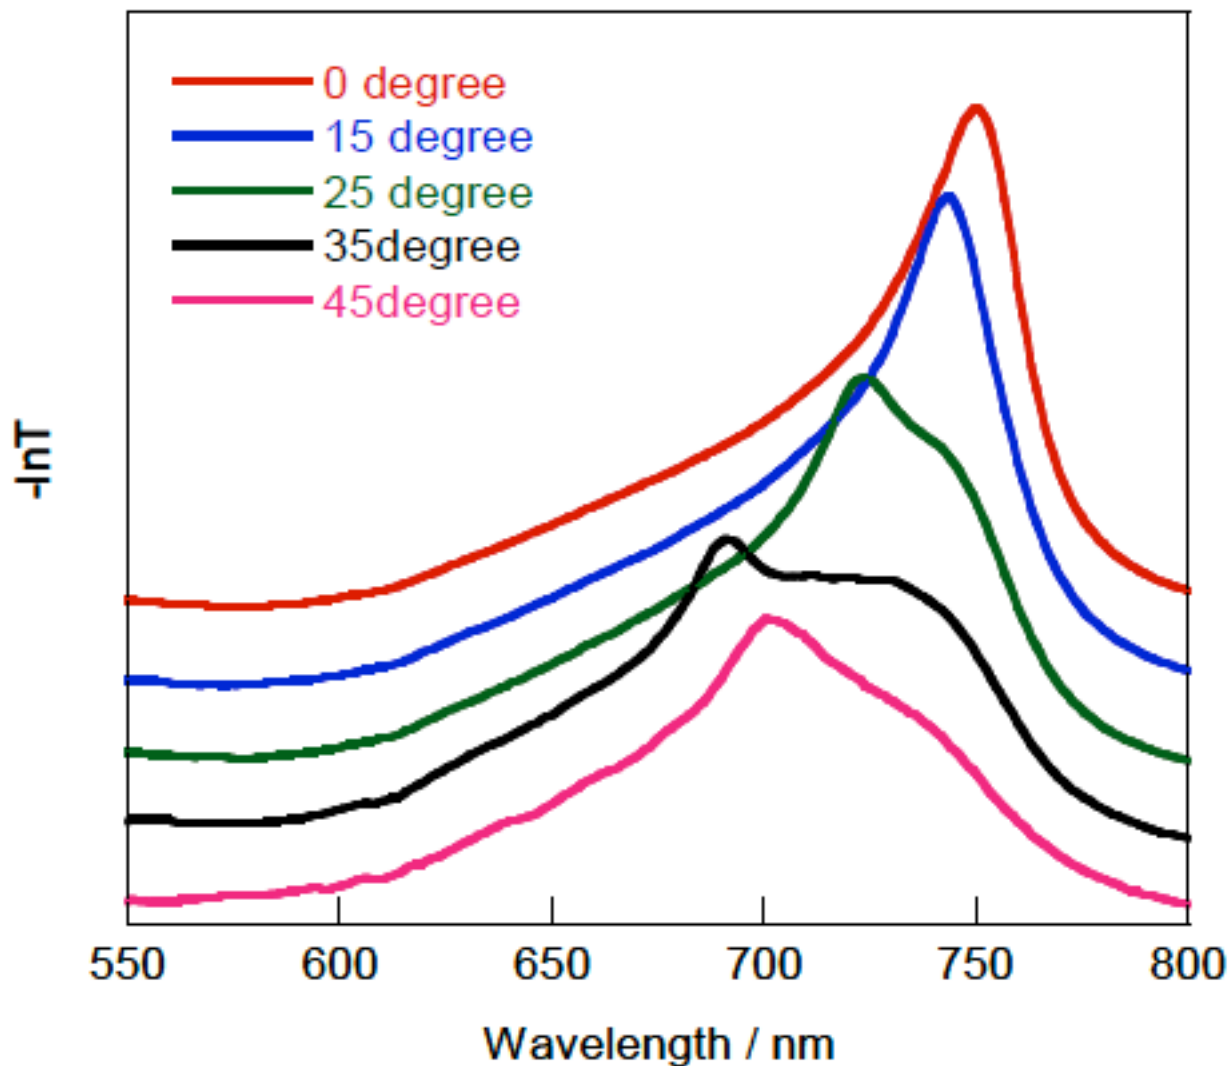

Figure S13. Transmission spectra of the thin membrane of colloidal crystal composed of PNIPA-SiP with 207 nm silica core particle and PNIPA of  $M_n = 2.55 \times 10^4$  measured at various angles at 25° C. This thin membrane was prepared from the ethanol suspension of the PNIPA-SiPs.

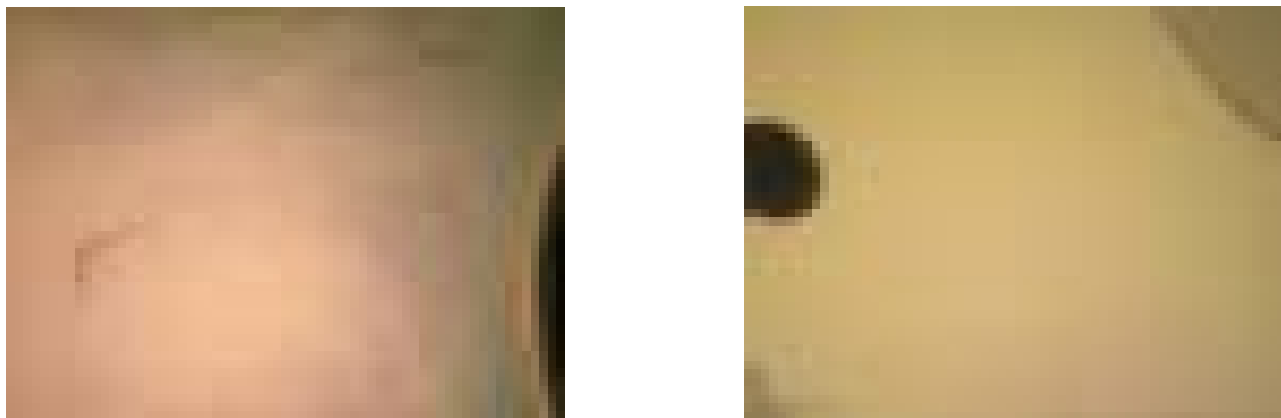

Figure S14. Photographs of the thin membrane of colloidal crystal (left) and the amorphous array (right) composed of PNIPA-SiP with 207 nm silica core particle and PNIPA of  $M_n = 2.55 \times 10^4$  measured at various angles at 25° C. Both of them are opaque due to the multiple scattering of light from the presence of disordered portions.
